# Supplementary material for: Probiotic Pediococcus pentosaceus Li05 Improves Cholestasis through the FXR-SHP and FXR-FGF15 Pathways
Source: MDPI journal article supplement (doi:10.3390/nu15234864), 2023-11-22
Supplement: s1 [file s1]

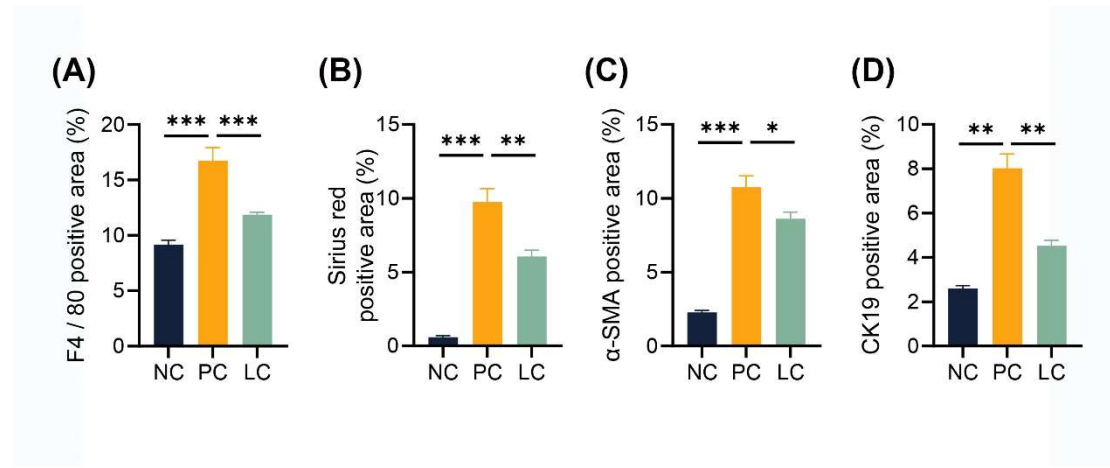

**Figure S1. Immunohistochemical quantitative analysis.** A-D) F4 / 80, Sirius red,  $\alpha$ -SMA and CK19 positive area proportion. Data are presented as mean  $\pm$  SEM, \*P < 0.05, \*\*P < 0.01 and \*\*\*P < 0.001 according to the one-way ANOVA test.
