# Supplementary material for: Probiotic Pediococcus pentosaceus Li05 Improves Cholestasis through the FXR-SHP and FXR-FGF15 Pathways
Source: MDPI journal article supplement (doi:10.3390/nu15234864), 2023-11-22
Supplement: s1 [file s1]

| Genes          | Primer sense (5'-3')     | Primer antisense (5'-3') |
|----------------|--------------------------|--------------------------|
| $\beta$ -actin | AGTGTGACGTTGACATCCGT     | GCAGCTCAGTAACAGTCCGC     |
| TNF- $\alpha$  | CCCTCACACTCAGATCATCTTCT  | GCTACGACGTGGGCTACAG      |
| IL-1 $\beta$   | GAAATGCCACCTTTTGACAGTG   | TGGATGCTCTCATCAGGACAG    |
| IL-6           | TCTATACCACTTCACAAGTCGGA  | GAATTGCCATTGCACAACTCTTT  |
| F4 / 80        | TGACTCACCTTGTGGTCCTAA    | TGACTCACCTTGTGGTCCTAA    |
| Collagen 1a1   | CTGGCGGTTTCAGGTCCAAT     | TTCCAGGCAATCCACGAGC      |
| Collagen III   | CTGGTCAGCCTGGAGATAAG     | ACCAGGACTACCACGTTTAC     |
| $\alpha$ -SMA  | TAGTCCTTCCTACCCCAATTTC   | TTGGTCCTTAGCCACTCCTTC    |
| TGF $\beta$    | CCACCTGCAAGACCATCGAC     | CTGGCGAGCCTTAGTTTGGAC    |
| CTGF           | GGGCCTCTTCTGCGATTTC      | ATCCAGGCAAGTGCATTGGTA    |
| TIMP1          | GCATCTCTGGCATCTGGCATC    | GGTATAAGGTGGTCTCGTTGA    |
| Cyp7a1         | AACAACCTGCCAGTACTAGATAGC | GTGTAGAGTGAAGTCCTCCTTAGC |
| Cyp27a1        | CCAGGCACAGGAGAGTACG      | GGGCAAGTGCAGCACATAG      |
| FXR            | TGTGAGGGCTGCAAAGGTTT     | ACATCCCCATCTCTCTGCAC     |
| SHP            | TCTGCAGGTTCGTCCGACTAT    | CAGGCAGTGGCTGTGAGAT      |
| FGF15          | GCCATCAAGGACGTCAGCA      | CTTCTCCGAGTAGCGAATCAG    |
| ASBT           | ACCACTTGCTCCACACTGCTT    | CGTTCCTGAGTCAACCCACAT    |
| NTCP           | CAAACCTCAGAAGGACCAAACA   | GTAGGAGGATTATTCCCGTTGTG  |
| BSEP           | TCTGACTCAGTGATTCTTCGCA   | GTGTAGAGTGAAGTCCTCCTTAGC |
| Ost $\alpha$   | TGTTCCAGGTGCTTGTCTATCC   | CCACTGTTAGCCAAGATGGAGAA  |
| Ost $\beta$    | GATGCGGCTCCTTGGAATTA     | GGAGGAACATGCTTGTCTATGAC  |
| MDR1           | ACACTTGGCCCCAAACATAGA    | GTCAATGCTTGGCTCGTTATCA   |
| MDR2           | CGGCGACTTTGAACTAGGCA     | CAGAGTATCGGAACAGTGTCAAC  |
| MRP2           | ACGTTTAGTTGGTATGACAGCAC  | TGCTTCTTGGTCAATCCGTGT    |
| V3-V4          | ACTCCTACGGGAGGCAGCAG     | GGACTACHVGGGTWTCTAAT     |
| ZO-1           | GCCGCTAAGAGCACAGCAA      | GCCCTCCTTTTAACACATCAGA   |
| Occludin       | TGAAAGTCCACCTCCTTACAGA   | CCGGATAAAAAGAGTACGCTGG   |
| MUC2           | AGGGCTCGGAACTCCAGAAA     | CCAGGGAATCGGTAGACATCG    |
| TGR5           | TGCTTCTTCCTAAGCCTACTACT  | CTGATGGTTCCGGCTCCATAG    |
| LGR5           | ACATTCCCAAGGGAGCGTTC     | ATGTGGTTGGCATCTAGGCG     |

Table S1. Primer sequences used for RT-qPCR.
